# Supplementary material for: Music in palliative care: a qualitative study with patients suffering from cancer
Source: Springer Nature journal article supplement (doi:10.1186/s12904-019-0461-2), 2019-10-07
Supplement: MOESM1 [file 17248230]

### **Questions for the semi-structured interview**

| <b>Order</b> | <b>Question</b>                                                                                                    |
|--------------|--------------------------------------------------------------------------------------------------------------------|
| 1            | Tell me about your meeting with the artists, including the circumstances. Was it the first time you met them here? |
| 2            | How did you feel about their proposal to sing for you? What did you think about the choice of songs?               |
| 3            | What happened to you and your entourage at this moment? How did you feel at this time?                             |
| 4            | How did you feel afterwards? What did you retain from this encounter? What effect did it have on you?              |
| 5            | What will you remember from this experience? Say what comes to your mind now, without thinking about it.           |
| 6            | What can we do to make the intervention better?                                                                    |
| 7            | Is there anything else you would like to mention?                                                                  |
